1 Phosphorylation of Threonine 107 by Calcium/Calmodulin dependent Kinase II  $\delta$  Regulates the  
2 Detoxification Efficiency and Proteomic Integrity of Glyoxalase 1

3 Jakob Morgenstern<sup>a\*</sup>, Sylvia Katz<sup>b</sup>, Jutta Krebs-Hauptenthal<sup>b</sup>, Jessy Chen<sup>b</sup>, Alireza Saadatmand<sup>b</sup>,  
4 Fabiola Garcia Cortizo <sup>c</sup>, Alexandra Moraru<sup>c</sup>, Johanna Zemva<sup>a</sup>, Marta Campos Campos<sup>a</sup>, Aurelio  
5 Teleman<sup>c</sup>, Johannes Backs<sup>b</sup>, Peter Nawroth<sup>a, d</sup>, Thomas Fleming<sup>a, d</sup>

6 <sup>a</sup>Department of Internal Medicine I and Clinical Chemistry, University Hospital Heidelberg, Heidelberg, Germany

7 <sup>b</sup>Department Molecular Cardiology and Epigenetics, University Hospital of Heidelberg, Heidelberg, Germany

8 <sup>c</sup>German Cancer Research Center (DKFZ), Heidelberg, Germany

9 <sup>d</sup>German Center for Diabetes Research (DZD), Neuherberg, Germany

10 \*Address correspondence to this author at: Department of Internal Medicine I and Clinical Chemistry, University Hospital Heidelberg, Im  
11 Neuenheimer Feld 410, 69120 Heidelberg, Germany; Fax: +496221 565226; e-mail: jakob.morgenstern@med.uni-heidelberg.de

12 **Abstract**

13 The glyoxalase system is a ubiquitously expressed enzyme system with narrow substrate  
14 specificity and is responsible for the detoxification of harmful methylglyoxal (MG), a  
15 spontaneous by-product of energy metabolism. Glyoxalase 1 (Glo1) is the first and therefore rate  
16 limiting enzyme of this protective system. In this study we were able to show that a  
17 phosphorylation of threonine-107 in the Glo1 protein, mediated by Ca<sup>2+</sup>/Calmodulin-dependent  
18 Kinase II delta (CamKII $\delta$ ), is associated with elevated catalytic efficiency of Glo1. In fact,  
19 Michaelis-Menten kinetics of Glo1 mutants revealed that a permanent phosphorylation of Glo1  
20 was associated with increased V<sub>max</sub> (1.23  $\mu$ mol/min/mg) and decreased K<sub>m</sub> (0.19 mM HTA),  
21 whereas the non-phosphorylatable Glo1 showed significantly lower V<sub>max</sub> (0.66  $\mu$ mol/min/mg)  
22 and increased K<sub>m</sub> (0.31 mM HTA). This was also confirmed with human recombinant Glo1  
23 (V<sub>max</sub> (Glo1<sub>phos</sub>) = 999  $\mu$ mol/min/mg; K<sub>m</sub> (Glo1<sub>phos</sub>) = 0.09 mM HTA vs. V<sub>max</sub> (Glo1<sub>red</sub>) = 497

24  $\mu\text{mol}/\text{min}/\text{mg}$ ;  $K_m$  (Glo1<sub>red</sub>) = 0.12 mM HTA). Additionally, proteasomal degradation of non-  
25 phosphorylated Glo1 via ubiquitination occurred more rapidly as compared to native Glo1. The  
26 absence of the responsible kinase CamKII $\delta$  was associated with poor MG detoxification capacity  
27 and decreased protein content of Glo1 in a murine CamKII $\delta$  knock-out model. Furthermore, this  
28 regulatory mechanism is also related to an altered Glo1 status in cancer, diabetes and during  
29 aging. In summary, phosphorylation of threonine-107 in the Glo1 protein by CamKII $\delta$  is a quick  
30 and precise mechanism regulating Glo1 activity.

31

32

33

34

35

36

37

38

39

40

41

## 42 **Introduction**

43 Glyoxalase 1 (Glo1) is the first enzyme of a catalytic complex described as the glyoxalase  
44 system, which is expressed in all living cells. It is mainly responsible for the detoxification of  
45 methylglyoxal (MG), a spontaneous by-product which is generated during glycolysis. MG is a  
46 highly reactive 2-oxoaldehyde and represents a precursor for advanced glycation endproducts  
47 (AGE), which are leading to increased reactive oxygen species in the cell [1]. Consequently,  
48 given the omnipresent formation of MG, the glyoxalase system represents a major mechanism in  
49 the xenobiotic metabolism to prevent oxidative stress [2].

50 In order to respond in an economical way to different cellular stimuli the glyoxalase system has  
51 to undergo rapid molecular adjustments. Glo1 can be nitrosylated in cooperation with  
52 glutathione, which leads to a decreased enzymatic activity; a phenomenon which has been  
53 described in crude organisms (yeast) and mammalian cells [7, 8]. Phosphorylation of Glo1 has  
54 also been found to be present in mammalian cells, yeast and in plants. In fibroblasts the  
55 phosphorylation has been linked to the induction of necrosis by TNF $\alpha$  [9]. In the same study  
56 threonine-107 (T107) was identified for the first time as one potential phosphorylation site, but  
57 neither the responsible kinase nor the enzymatic consequences could be shown [10]. In which  
58 way post-translational modifications of Glo1 regulate the efficiency of the glyoxalase system  
59 within various pathological contexts is currently not understood. However, alterations of Glo1  
60 and its activity seems to play a pivotal role in various clinical contexts such as diabetes, aging, as  
61 a potential drug target regarding cancer therapeutics but also as treatment against bacteria or  
62 protozoans [3, 4]. Furthermore, psychological disorders, e.g. anxiety-like behavior as well as  
63 alcohol use disorders have been linked to altered Glo1 [5, 6]. The aim of this study was to

64 investigate the phosphorylation of Glo1, characterize responsible kinase(s) and describe  
65 consequences *in vitro* and *in vivo*.

66  
67  
68  
69  
70  
71  
72  
73  
74  
75  
76  
77  
78  
79  
80  
81  
82  
83  
84  
85  
86  
87  
88  
89  
90  
91  
92  
93  
94  
95  
96  
97  
98  
99  
100  
101  
102  
103  
104  
105  
106  
107

## 108 **Results**

### 109 *Phosphorylation of Glyoxalase 1 at threonine 107 affects kinetic efficiency of methylglyoxal* 110 *detoxification and proteasomal degradation rate*

111 In order to investigate the effect of a Glo1 phosphorylation at T107, two murine cardiac  
112 endothelial cell models were established. For both cell model systems a previously established  
113 Glo1 knock-out model was used in order to prevent any endogenous Glo1 activity  
114 (supplementary Figure 1; material & methods). The permanently phosphorylated clone (P) was  
115 established with an exchange of threonine to glutamic acid T107E, whereas the non-  
116 phosphorylatable clone (NP) was established with an exchange of threonine to alanine  
117 (T107>G107) (supplementary figure 1; materials & methods). When Glo1 activity was  
118 normalized to total protein content a Michaelis-Menten kinetic revealed that a permanent  
119 phosphorylation of Glo1 was associated with increased  $V_{\max}$  (1.23  $\mu\text{mol}/\text{min}/\text{mg}$ ) and decreased  
120  $K_m$  (0.19 mM HTA), whereas the NP clone showed significantly lower  $V_{\max}$  (0.66  $\mu\text{mol}/\text{min}/\text{mg}$ )  
121 and increased  $K_m$  (0.31 mM HTA). Wild-type (WT) cells showed an enzymatic efficiency  
122 between those two clones ( $V_{\max} = 0.95 \mu\text{mol}/\text{min}/\text{mg}$ ;  $K_m = 0.24 \text{ mM HTA}$ ) reflecting  
123 potentially an intermediate state of Glo1 phosphorylation (Figure 1 A). Regarding intracellular  
124 MG concentrations NP clones showed an approximately 50% increase as compared to the WT-  
125 and P-clones (Figure 1 B). Using flow cytometry and dichlorofluorescein, the intracellular ROS  
126 levels were quantified, which revealed that NP-clones have significantly higher ROS levels (151  
127  $\pm 13$  a.u.) as compared to P-clones (108  $\pm 11$  a.u.) and WT cells (100  $\pm 7$  a.u.) (Figure 1 C). As a  
128 consequence NP-clones showed nuclear damage, displayed by significantly increased tail length  
129 in a comet assay (Figure 1 D) and increased p53- as well as  $\gamma\text{H2Ax}$ - expression in cells lacking  
130 Glo1 phosphorylation (NP) (Figure 1 E). This resulted also in lower proliferation rates as

131 measured by bromo deoxyuridine incorporation, in which NP clones displayed only ~58%  
132 proliferation rate of the WT cells (Figure 1 F).

133 In order to investigate whether Glo1 protein stability was affected by the phosphorylation status  
134 of T107, cycloheximide (CHX), a protein synthesis inhibitor, was used. During the treatment  
135 NP-clones showed a rapid degradation of Glo1 protein as compared to the WT clones; whereas  
136 in P-clones Glo1 protein was not changed after 8 hrs of CHX treatment (Figure 1 G). Using a  
137 proteasome inhibitor (MG132), NP-clone showed no change in protein content comparable to  
138 WT and P-clones after 8 hrs of treatment (Figure 1 H). To confirm that it is the rapid degradation  
139 of Glo1 via ubiquitinylation in the NP-clones, a ubiquitin-pull-down experiment revealed that  
140 NP-clones had a significantly higher concentration of Glo1 in the ubiquitin isolated fraction  
141 (Figure 1 I).

142

FIGURE 1

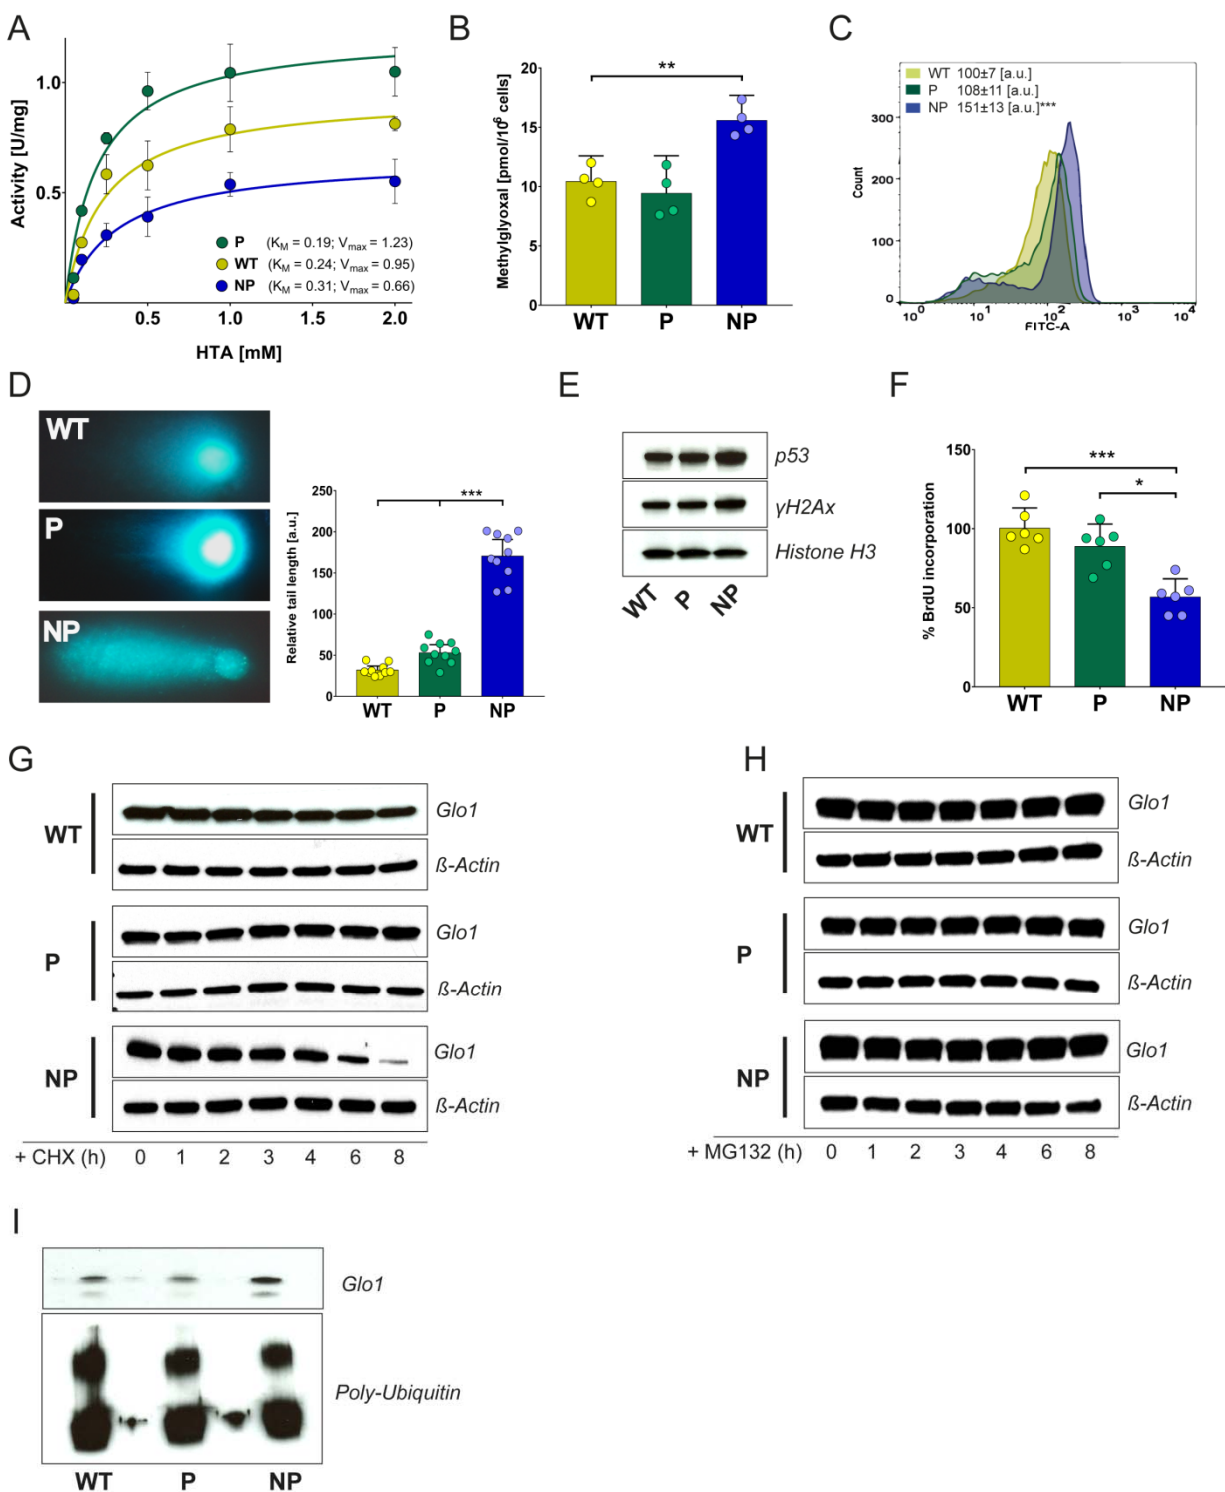

143

144

145 **Figure 1 - Phosphorylation of Glyoxalase 1 at threonine 107 affects kinetic efficiency of**  
146 **methylglyoxal detoxification.**

147 **A**, kinetic profile of the Glo1 catalysed reduction of hemithioacetal in wild-type (WT), phosphorylated  
148 (P) and non-phosphorylated (NP) clones. **B**, intracellular MG-levels in wild-type (WT), phosphorylated  
149 (P) and non-phosphorylated (NP) clones cultured under baseline conditions (5 mM Glucose).  
150 **C**, intracellular levels of reactive oxygen species in wild-type (WT), phosphorylated (P) and non-  
151 phosphorylated (NP) clones under baseline conditions (5 mM Glucose) using flow cytometry and  
152 H<sub>2</sub>DCFDA as reagent. **D**, left: Oxidation of cellular DNA measured by Comet Assay in wild-type (WT),  
153 phosphorylated (P) and non-phosphorylated (NP) clones under baseline conditions (5 mM Glucose).  
154 Right: Relative tail length of appropriate comets (n=15) in wild-type (WT), phosphorylated (P) and non-  
155 phosphorylated (NP) clones under baseline conditions (5 mM Glucose). **E**, representative western blot  
156 analysis of total cell extracts (30 µg of protein) from wild-type (WT), phosphorylated (P), non-  
157 phosphorylated (NP) clones and from wild-type cells probed with anti-p53 antibody, anti-γH2Ax  
158 antibody and anti-β-Actin antibody as a loading control. **F**, median proliferation rate in wild-type (WT),  
159 phosphorylated (P) and non-phosphorylated (NP) clones under baseline conditions (5 mM Glucose). **G**,  
160 representative western blot analysis of total cell extracts (30 µg of protein) from wild-type (WT),  
161 phosphorylated (P) and non-phosphorylated (NP) clones after cycloheximide (CHX; 10µg/mL) treatment  
162 probed with anti-Glo1 antibody and anti-β-Actin antibody as a loading control. **H**, representative western  
163 blot analysis of total cell extracts (30 µg of protein) from wild-type (WT), phosphorylated (P) and non-  
164 phosphorylated (NP) clones after MG-132 treatment (10 µM) probed with anti-Glo1 antibody and anti-β-  
165 Actin antibody as a loading control. **I**, representative western blot analysis of total cell extracts (100 µg of  
166 protein) from wild-type (WT), phosphorylated (P) and non-phosphorylated (NP) clones after an ubiquitin-  
167 pull-down approach probed with anti-Glo1 antibody and anti-Poly-Ubiquitin antibody as a loading  
168 control. All data represent the mean of 4-10 independent experiments ± standard deviation. \*\*\* p <  
169 0.001; \*\* p < 0.01; \* p < 0.05.

170

171

172

173

174

175

176

177

178

179

180

181



182

183 *Phosphorylation of Glyoxalase 1 is mediated by CamKII $\delta$  in vitro and in vivo*

184 Preliminary results (data not shown) suggested that CamKII is a suitable candidate in order to  
185 investigate the effect of a Glo1 phosphorylation. A [ $\gamma$ - $^{32}$ P]-ATP Kinase assay revealed that  
186 Ca $^{2+}$ /calmodulin-dependent protein kinase II  $\delta$  (CamKII $\delta$ ) can phosphorylate recombinant  
187 human Glo1 protein in a dose-dependent manner (Figure 2 A). Using recombinant human Glo1, a  
188 Michaelis-Menten kinetic was performed in order to compare the results with kinetics obtained  
189 from Glo1 mutants (see Figure 1). In line with the previous results it showed a two-fold  
190 increased  $V_{\max}$  and an increased affinity of phosphorylated Glo1 in comparison to reduced Glo1  
191 ( $V_{\max}$  (Glo1<sub>phos</sub>) = 999  $\mu$ mol/min/mg;  $K_m$  (Glo1<sub>phos</sub>) = 0.09 mM HTA vs.  $V_{\max}$  (Glo1<sub>red</sub>) = 497  
192  $\mu$ mol/min/mg;  $K_m$  (Glo1<sub>red</sub>) = 0.12 mM HTA) (Figure 2 B). The pharmacological inhibition of  
193 CamKII via KN93 in endothelial cells showed a decline in Glo1 activity and protein content after  
194 24 hrs (Figure 2 C & E). This was accompanied by a mild, but significant, increase (~20%) in  
195 intracellular MG concentrations (Figure 2 D). An overexpression of CamKII $\delta$  was not linked to  
196 an increase of Glo1 activity (Figure 2 F). Using a Phos-tag approach, a major shift in Glo1 band  
197 was observed in recombinant human Glo1 incubated with CamKII $\delta$  and ATP as well as cells  
198 treated with KN93. Validity of this band-shift caused by altered phosphorylation status was  
199 confirmed using  $\lambda$ -Protein Metallo-Phosphatase where the upper band disappeared (Figure 2 G).

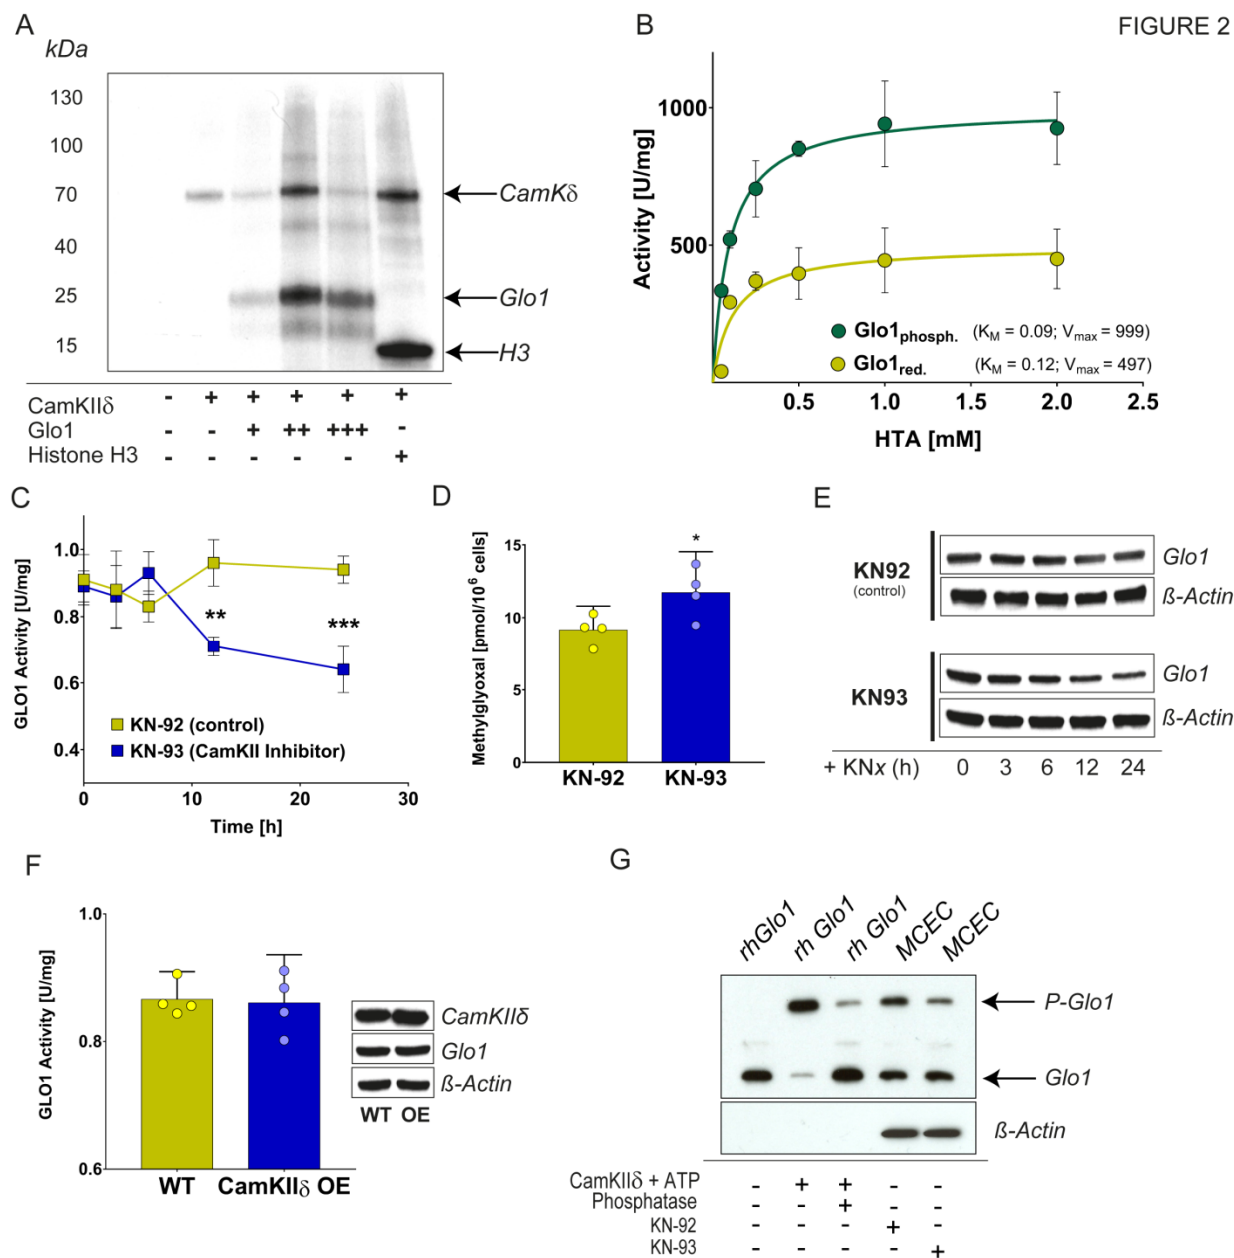

200  
201

**Figure 2 - Phosphorylation of Glyoxalase 1 is mediated by CamKIIδ *in vitro* and *in vivo*.**

202 **A**, representative autoradiography blot of recombinant human Glo1 protein using radioactive ATP ( $\gamma$ - $^{32}$ P)  
 203 with & without CamKIIδ and Histone H3 as control. **B**, kinetic profile of the Glo1 catalysed reduction of  
 204 hemithioacetal using phosphorylated recombinant human protein (Glo1<sub>phos</sub>) and unphosphorylated  
 205 recombinant human protein (Glo1<sub>red</sub>). **C**, Glo1 catalysed reduction of hemithioacetal in wild-type cells 6-24  
 206 hrs after specific KNx treatment. **D**, intracellular MG-levels in wild-type cells after specific KNx  
 207 treatment. **E**, representative western blot analysis of total cell extracts (30 μg of protein) from wild-type  
 208 cells after specific KNx treatment probed with anti-Glo1 antibody and anti-β-Actin antibody as a loading  
 209 control. **F**, Glo1 catalysed reduction of hemithioacetal in wild-type cells 12 hrs after over-expression (OE)  
 210 of CamKIIδ. **G**, representative western blot analysis of cytosolic cell extracts (30 μg of protein) using a  
 211 Phos-Tag-Gel (Zinc) approach of recombinant human Glo1 and wild-type cells (MCEC) after specific

212 KNx treatment probed with anti-Glo1 antibody and anti- $\beta$ -Actin antibody as a loading control. All data  
213 represent the mean of at least 4 independent experiments  $\pm$  standard deviation. \*\*\*  $p < 0.001$ ; \*\*  $p <$   
214  $0.01$ ; \*  $p < 0.05$

215

216 *CamKII $\delta$  knock-out model reflects a loss of Glo1 protein/activity due to missing phosphorylation*  
217 *status*

218 A murine model with a global CamKII $\delta$  knock-out (KO) was used to investigate the impact of a  
219 total absence of CamKII $\delta$  towards Glo1 protein and its phosphorylation status. In 20-weeks old  
220 male C57BL/6 CamKII $\delta$  KO mice, the protein content of Glo1 was globally reduced by  
221 approximately 50% compared to control animals, with the liver and heart being the most affected  
222 (Figure 3 A). This was also confirmed by Glo1 enzyme activities in those organs (Figure 3 B).  
223 The observed downregulation of Glo1 protein and activity in CamKII $\delta$  KO mice was associated  
224 with a decrease in its phosphorylation status in the liver tissue (Figure 3 F). Interestingly, the  
225 CamKII $\delta$  KO mice model was neither linked to increased MG nor MG-H1 concentrations in  
226 whole tissue lysates (Figure 3 C & D). However, potential nuclear damage was shown by  
227 increased p53-, but not  $\gamma$ H2Ax-expression in those tissues as compared to *in vitro* results (Figure  
228 3 E).

229

230

231

232

233

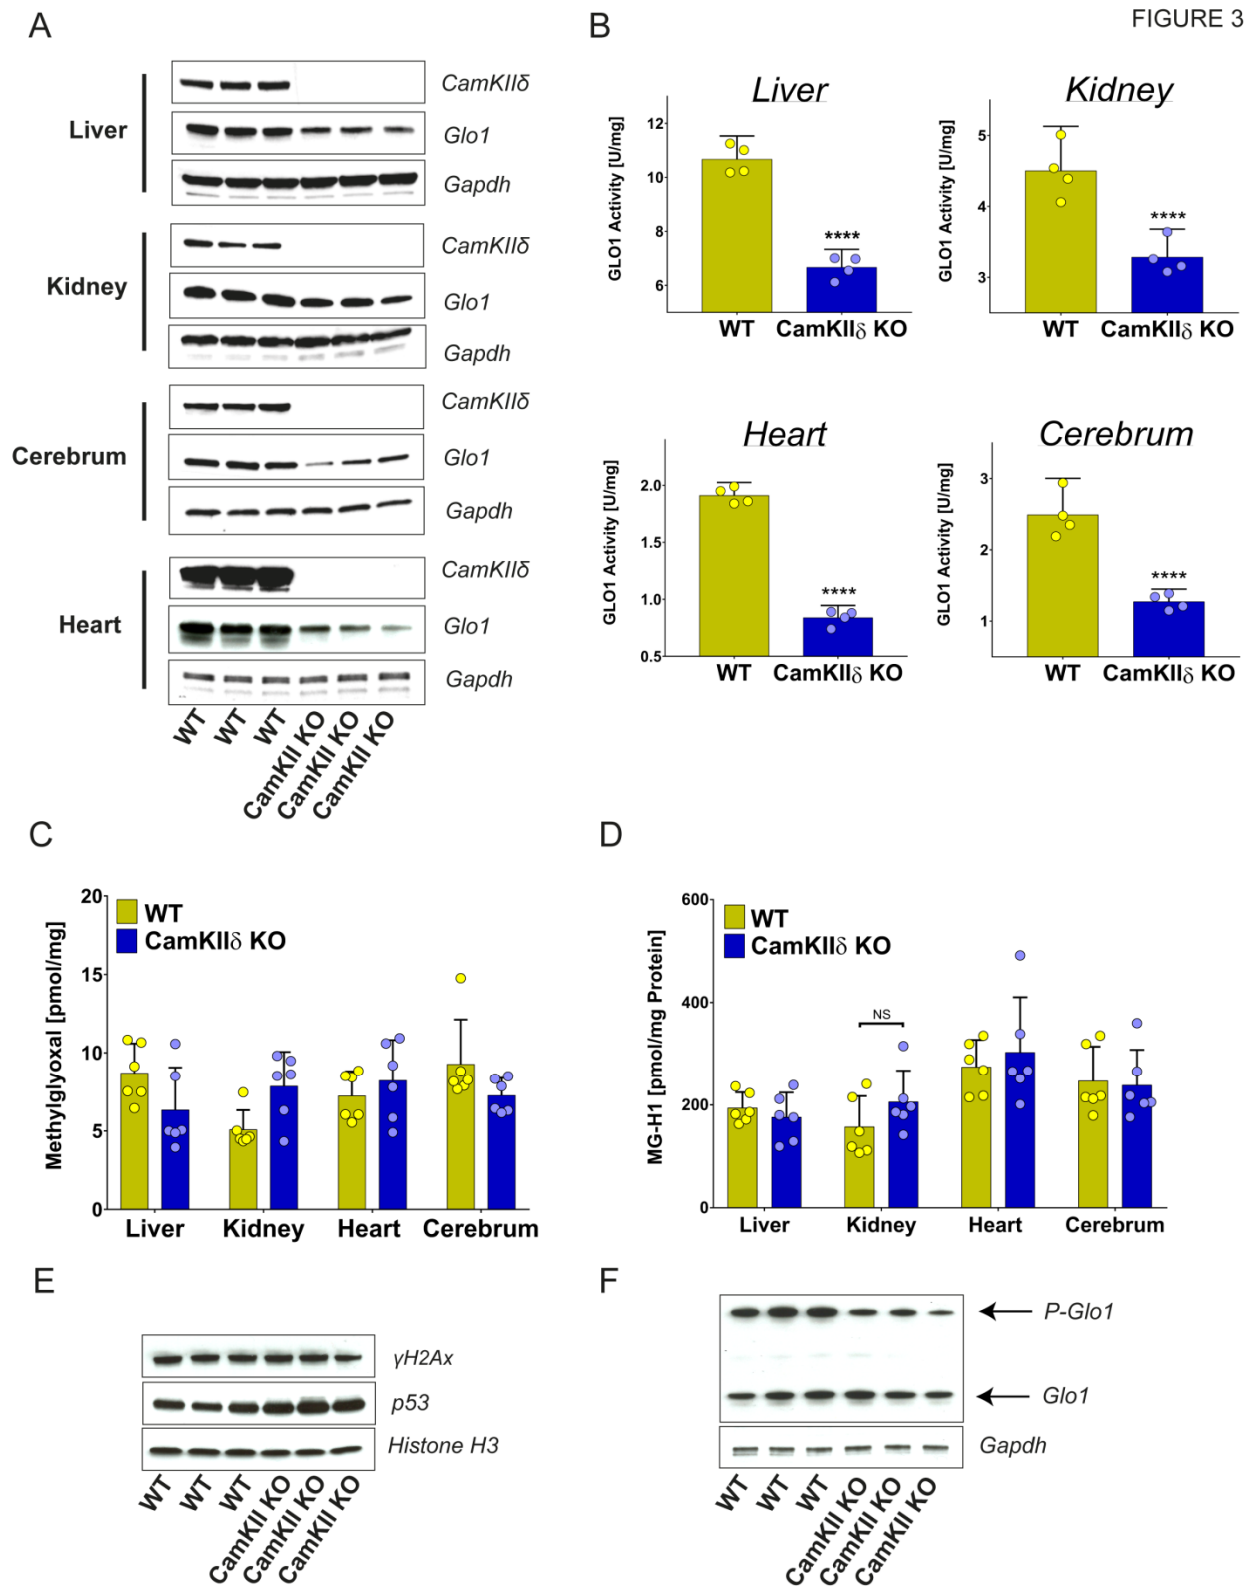

234

235

236 **Figure 3 - Unphosphorylated Glo1 is linked to nuclear MG accumulation and damage.**

237 **A**, representative western blot analysis of cytosolic cell extracts (30 µg of protein) of various tissues from  
238 wild-type (WT) and CamKIIδ KO mice probed with anti-CamKIIδ antibody, anti-Glo1 antibody and anti-  
239 GAPDH antibody as a loading control. **B**, Glo1 catalysed reduction of hemitioacetal in cytosolic cell  
240 extracts of various tissues from wild-type (WT) and CamKIIδ KO mice. **C**, MG levels in various whole  
241 tissue sections from wild-type (WT) and CamKIIδ KO mice. **D**, MG-H1 levels in various whole tissue  
242 sections from wild-type (WT) and CamKIIδ KO mice. **E**, representative western blot analysis of total cell  
243 extracts (30 µg of protein) of liver tissue from wild-type (WT) and CamKIIδ KO mice probed with anti-  
244 p53 antibody and anti-Histone H3 antibody as a loading control. **F**, representative western blot analysis of  
245 cytosolic liver extracts (30 µg of protein) using a Phos-Tag-Gel (Zinc) approach of wild-type (WT) and  
246 CamKIIδ KO mice probed with anti-Glo1 antibody and anti-GAPDH antibody as a loading control. All  
247 data represent the mean of 4-6 independent experiments ± standard deviation. \*\*\*\* p < 0.0001

248

249

250

251

252

253

254

255

256

257

258

259

260

261

262

263

264

265 *Glo1 activity and protein status is altered in diabetes, cancer or during aging and is linked to its*  
266 *phosphorylation status*

267 In type 1 (Streptozotocin (STZ)) and type 2 (leptin deficient (db/db) diabetic mouse model it was  
268 revealed that liver tissue showed significantly decreased Glo1 activity as compared to the WT  
269 controls already at 20 weeks of age (Figure 4 A & B). This decline was most pronounced in liver  
270 tissue, but was a global phenomenon observable in all major tissues (data not shown). In both  
271 diabetic animal models the decrease in Glo1-activity and protein content in the liver was also  
272 associated with a lower phosphorylation status of Glo1 as compared to WT animals (Figure 4 D  
273 & E). Furthermore, Glo1 activity also declined during aging with approximately 50% reduction  
274 in 80 weeks old WT mice as compared to 10 weeks old wild-type mice (Figure 4 B). Again, this  
275 phenomenon was linked to a lack of Glo1 phosphorylation during aging (Figure 4 E). In addition  
276 to ageing and diabetes, altered Glo1 activity has been described frequently in various malignant  
277 solid tumors. In two human cell lines derived from breast cancer (MCF-7) and cervical cancer  
278 (HeLa) Glo1 activity and protein content were screened. The comparison with human umbilical  
279 endothelial cells (HUVECs) revealed a 2.5- (MCF-7) and 1.4-(HeLa) fold higher Glo1-activity  
280 and Glo1 protein content of the cancerous cell lines (Figure 4 C & D). Especially in MCF-7 cells  
281 it was shown an increased state of Glo1 phosphorylation as compared to HUVECS, whereas  
282 HeLa cells showed an intermediate state of Glo1 phosphorylation (Figure 4 E). Regarding the  
283 expression status of CamKII $\delta$  we found reduced mRNA levels in liver tissue of both diabetic  
284 animal models, but a highly increased CamKII $\delta$  expression in cancerous cell lines as compared  
285 to HUVECs (Figure 4 F).

286

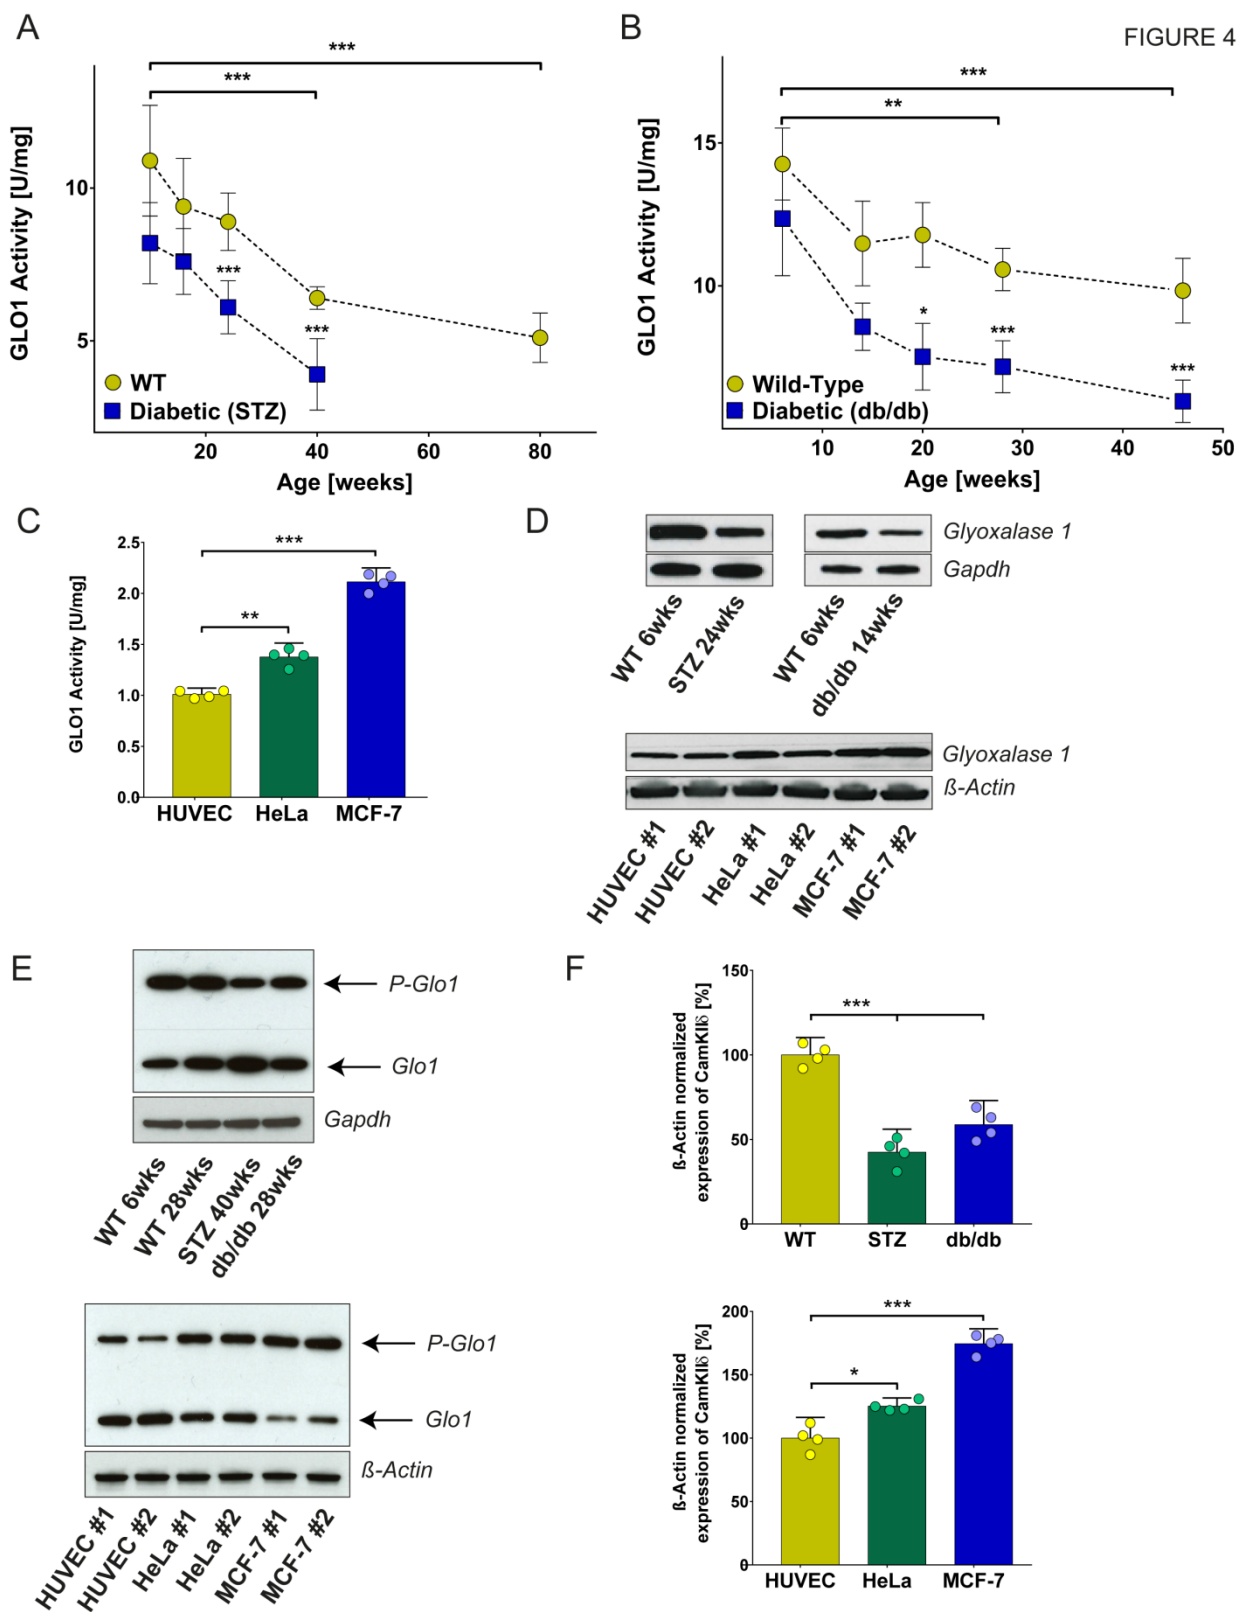

287

288

289 **Figure 4 - Glo1 activity and protein status is altered in diabetes, cancer and during aging and is**  
290 **linked to its phosphorylation status**

291 **A**, Glo1 activity in liver tissue of wild-type (WT) and diabetic (STZ) mice between 10 and 80 weeks of  
292 age. **B**, Glo1 activity in liver tissue of wild-type (WT) and diabetic (db/db) mice between 6 and 46 weeks  
293 of age. **C**, Glo1 catalysed reduction of hemithioacetal in Human Umbilical Vein Endothelial Cells  
294 (HUVEC), cervical cancer cells (HeLa) and breast carcinoma endothelial cells (MCF-7). **D**, top;  
295 representative western blot analysis of cytosolic cell extracts (30 µg of protein) from liver tissue of wild-  
296 type mice (WT), STZ treated mice and leptin deficient mice (db/db) of different age (e.g. 6 wks - 6 weeks  
297 of age) probed with anti-Glo1 antibody and anti-GAPDH antibody as a loading control. Bottom;  
298 representative western blot analysis of cytosolic cell extracts (30 µg of protein) of Human Umbilical Vein  
299 Endothelial Cells (HUVEC), cervical cancer cells (HeLa) and breast carcinoma endothelial cells (MCF-7)  
300 probed with anti-Glo1 antibody and anti-β-Actin antibody as a loading control. **E**, top; representative  
301 western blot analysis of cytosolic liver extracts (30 µg of protein) using a Phos-Tag-Gel (Zinc) approach  
302 of wild-type mice (WT), STZ treated mice and leptin deficient mice (db/db) of different age (e.g. 6 wks -  
303 6 weeks of age) probed with anti-Glo1 antibody and anti-GAPDH antibody as a loading control. Bottom;  
304 representative western blot analysis of cytosolic liver extracts (30 µg of protein) using a Phos-Tag-Gel  
305 (Zinc) approach of Human Umbilical Vein Endothelial Cells (HUVEC), cervical cancer cells (HeLa) and  
306 breast carcinoma endothelial cells (MCF-7) probed with anti-Glo1 antibody and anti-β-Actin antibody as  
307 a loading control. **F**, top; mRNA expression of CamKIIδ in liver tissue of wild-type (WT), type 1 diabetes  
308 (STZ) and type 2 diabetes (db/db) mice normalized to β-Actin. Bottom; mRNA expression of CamKIIδ in  
309 Human Umbilical Vein Endothelial Cells (HUVEC), cervical cancer cells (HeLa) and breast carcinoma  
310 endothelial cells (MCF-7) normalized to β-Actin. All data represent the mean of at least 4 independent  
311 experiments ± standard deviation. \*\*\* p < 0.001; \*\* p < 0.01; \* p < 0.05

312

313

314

315

316

317

318

319

320

321

322

323

324



## 325 **Discussion**

326 Due to its ubiquitous existence in all living cells (Glo1 is in the top 10% of intracellular protein  
327 abundancy), it is believed that the glyoxalase system has a highly conserved and therefore  
328 fundamental role [16, 17, 20]. The associations between the glyoxalase system, in particular  
329 Glo1, and patho-mechanisms in diabetes, cancer, anxiety, aging, HIV or drug abuse are striking  
330 and suggest that Glo1 has a central role in the maintenance of molecular homeostasis [6, 8, 9,  
331 10]. However, after decades of research it seems the only conclusive function of the glyoxalase  
332 system is the detoxification of MG, a by-product of energy metabolism [7]. In addition,  
333 independent studies showed in various Glo1 KO models that this enzyme system is not  
334 indispensable for living cells due to effective compensatory detoxification of harmful MG [14,  
335 15, 19, 21].

336 Post-translational modifications of Glo1, have generally been overlooked as a regulator of its  
337 biological function, with only a few limited studies have been conducted. In plants (*arabidopsis*  
338 *thaliana*) Glo1 was phosphorylated via the kinase SnRK2.8, a kinase involved in stress response.  
339 This phosphorylation of Glo1 was associated with an increase in enzyme activity [16]. The  
340 treatment of yeast with mating factor resulted in the same consequences; a phosphorylated Glo1  
341 with increased enzymatic activity [17]. In mammals the situation seems to be more complex and  
342 experimental results are rare, as well as partly inconsistent. In a redox-dependent regulation it  
343 was found that Glo1 can be glutathionylated, but is dependent on the addition of NO, which  
344 consequently leads to the formation of S-nitrosogluthathione through Glo1. The glutathionylation  
345 of Glo1 at cysteine 139 and the formation of S-nitrosogluthathione are both leading to an  
346 inhibition of enzymatic activity [12, 18]. Subsequent studies were able to identify a  
347 phosphorylation site of Glo1 in L929 cells; a necessity for the induction of necrosis by tumor

348 necrosis factor alpha [9, 10]. Within this context, the authors of this study speculated that  
349 phosphorylation of Glo1 is necessary for cell death and that this is either driven by protein kinase  
350 A, glycogen synthase kinase 3 or CamKII [9, 11]. Interestingly, this study did not find any  
351 evidence for altered enzyme kinetics driven by phosphorylation. Methodical limitations (assay  
352 was performed under substrate saturation) could be an explanation for this contradictory finding.  
353 Furthermore, the authors' hypothesis "Glo1 inducing cell death" can be interpreted as  
354 controversial, given the background that Glo1 has a highly conserved protective function within  
355 the cell.

356 The experimental study herein presents evidence that CamKII $\delta$  is a major regulator of the Glo1  
357 phosphorylation status. This phenomenon has significant consequences for enzymatic efficiency  
358 and proteasomal degradation of Glo1 *in vivo*. In fact phosphorylation of threonine 107 leads to  
359 an optimized enzymatic efficiency with higher  $V_{\max}$  and lower  $K_m$  values. From a stereochemical  
360 viewpoint, a strong negative charge from a phosphate group alters how a given protein is shaped,  
361 but more important how it interacts with water. When an enzyme becomes more hydrophilic it  
362 can interact with hydrophilic substrates more efficiently. The substrate of Glo1, MG, occurs  
363 under physiological conditions >99% in a mono- and dihydrated form, which binds it easily to  
364 the cysteine group of GSH [22]. Additionally, the catalytic mechanism suggests that the activity  
365 of Glo1 is driven by the capacity of the hydrogen bonding network of glutamate 172, which is  
366 likely the proton abstracting base within the catalytic mechanism. In line with recent  
367 stoichiometric findings, it can be hypothesized that the hydrophilic environment due to  
368 phosphorylation of threonine 107 points towards optimized kinetic conditions for the removal of  
369 a proton from carbon 1 of the hemithioacetal moiety of the substrate and consecutive transfer to  
370 carbon 2 of the same molecule [23].

371 Moreover, the experiments herein showed that decreased Glo1 phosphorylation is highly  
372 associated with declined Glo1 activity in aging or diabetes and that the opposite effect seems to  
373 take place in human tumor cells, where Glo1 activity is highly upregulated. In line with that,  
374 CamKII $\delta$  expression shows also an increase in tumor cells and a downregulation in diabetic  
375 animal models. Therefore, we provide for the first time an explanation for phenomena, which  
376 have been described for a long time in a broad range of experimental and clinical contexts [4, 5,  
377 6, 24, 25, 26, 27]. Further studies should focus on CamKII $\delta$  expression and the effect towards  
378 activity of Glo1 in order to reveal new molecular linkages.

## Enzyme Efficiency

## Protein Degradation

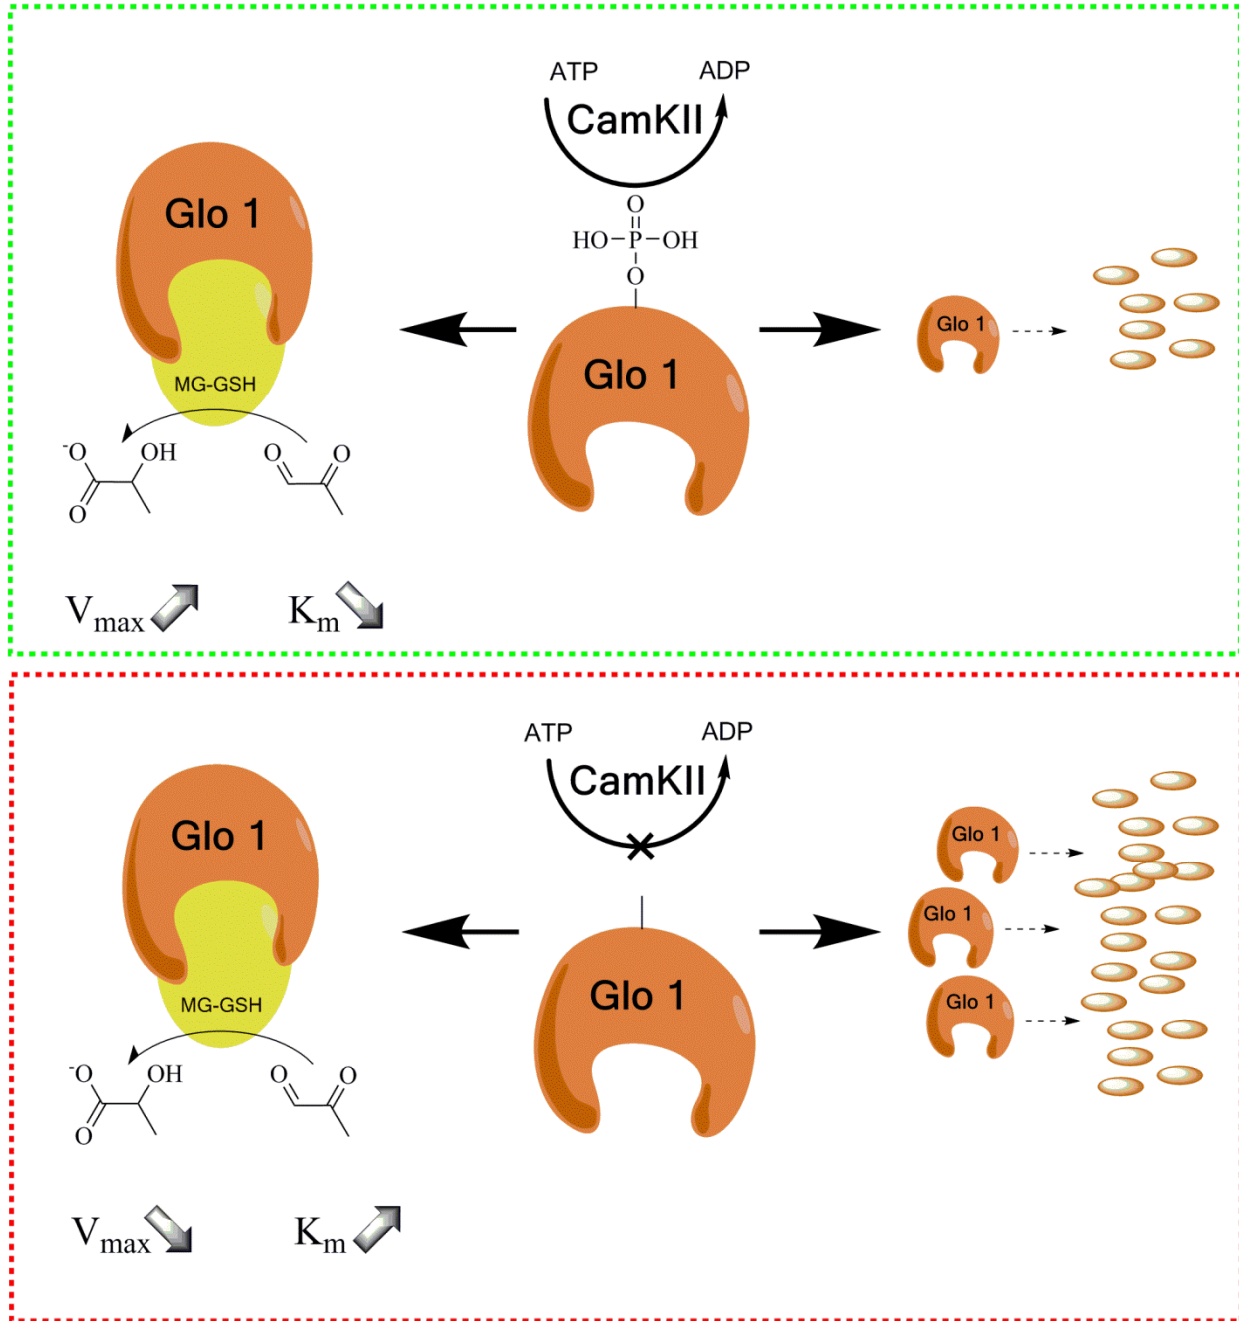

379

380 **Figure 5**

381 Proposed mechanism of action

382

## 383 **Materials & Methods**

384 *Cell culture*—Human HeLa cells derived from cervical cancer, MCF-7 cells derived from  
385 a human breast cancer and primary murine cardiac endothelial cells (MCEC) immortalized with  
386 SV40 large T antigen were obtained from ATCC®. Primary human umbilical vein endothelial  
387 cells (HUVECs) were isolated from the vein of the umbilical cord of pooled donors  
388 (PromoCell®). Cells were grown in DMEM (gibco) with 1 g/mL glucose (MCEC) or 4.5 g/mL  
389 (HUVEC, HeLa, MCF-7) containing 10% FCS (Sigma), 1% penicillin (10000 Units/ml) (gibco),  
390 1% streptomycin (10 mg/ml) (gibco), 1% amphotericin B (250 µg/ml) (gibco) and 1 mM HEPES  
391 (gibco) at 37°C in a saturated humidity atmosphere containing 95% air and 5% CO<sub>2</sub>. Cells were  
392 grown to 60% confluence for *in vitro* experiments and passaged at 80% confluence using 0.05%  
393 Trypsin-EDTA (gibco) for a maximum of four consecutive passages.

394 *Generation of non-phosphorylatable (NP) and permanent phosphorylated (P) Glo1*  
395 *mutants*—Murine cardiac endothelial cells (MCEC) with a complete Glo1 knock-out (KO) were  
396 established using CRISPR/Cas9 technique as described previously [19]. Amino acid substitution  
397 in Glo1 KO MCECs was then achieved permanently by site-directed mutagenesis carried out by  
398 Eurofins Scientific®. Briefly, Glo1 KO MCECs were transfected with WT plasmids for Glo1,  
399 whereas NP-mutants were transfected with a plasmid leading to an exchange of threonine to  
400 glycine (T107G); P-mutants were transfected with a plasmid leading to an exchange of threonine  
401 to glutamic acid (T107E). Cell clones were isolated by single cell seeding in a serial dilution  
402 approach. After at least 5 passages mutant colonies were picked and screened for Glo1 activity  
403 and protein.

404 *Preparation of total/cytosolic protein extracts*—For cytosolic extracts 500 µl cold lysis-  
405 buffer (10 mM HEPES, 1.5 mM MgCl<sub>2</sub>, 10 mM KCl, 0.5 mM DTT, 0.05% NP40 supplemented  
406 with a premade protease/phosphatase inhibitor cocktail (Sigma) including AEBSF, Aprotinin,  
407 Bestatin, E-64, Leupeptin, Pepstatin A) was added to 3x10<sup>6</sup> cells or 30 µg of pulverized tissue.  
408 Samples were then homogenized by passing the lysate 20 times through a 20G needle. After  
409 centrifugation (8000 rpm, 10 min, 4°C) the supernatant was used for protein determination and  
410 further analysis. For total extracts 500 µl of cold Radioimmunoprecipitation buffer (RIPA; 50  
411 mM Tris-HCl; pH 7.5, 150 mM NaCl, 1% NP40, 0.5% sodium deoxycholate, 0.1% SDS, 0.5  
412 mM DTT, 1000 units benzonase) was used and supplemented with a premade protease inhibitor  
413 cocktail (see above). 4x10<sup>6</sup> cells or 30 µg of pulverized tissue were vortexed and sonicated for 30  
414 seconds (50% power, 3 cycles) with an ultrasonic homogenizer HD2070 (Bandelin). After 30  
415 min of incubation samples were centrifuged (14000 rpm, 10 min, 4°C) and supernatant was used  
416 for protein determination and further analysis. All protein concentrations were determined using  
417 the Bradford technique and BSA as calibration standard as described previously [28].

418 *Glo1 activity assay*—Activity of GLO1 was determined spectrophotometrically as  
419 described previously [29]. Briefly, the method monitors the initial rate of change in absorbance  
420 at 235 nm caused by the formation of S-D-lactoylglutathione through catalysis of Glo1. For  
421 Michaelis-Menten kinetics the assay mixture contained 0.1 - 2 mM MG (enzyme activity only  
422 with substrate saturating conditions; 2 mM MG) and 2 mM GSH in sodium phosphate buffer (50  
423 mM, pH 6.6, 37°C) and was incubated for 15 min in advance to guarantee the complete  
424 formation of hemithioacetal. After the addition of the cytosolic protein fraction (1 µg/µl) the

425 change in absorbance was monitored for 15 min. The activity of Glo1 described in units (U),  
426 where 1 U is the amount of GLO1 which catalyzes the formation of 1  $\mu$ mol of S-D-  
427 lactoylglutathione per minute. Recombinant human Glo1 (ab87413) and recombinant human  
428 CamKII $\delta$  (ab84552) for Glo1 kinetic analysis were purchased from Abcam.

429 *Quantification of methylglyoxal (MG) and methylglyoxal-derived hydroimidazolone*  
430 *(MG-HI)*—The quantification of MG and MG-HI by stable isotopic dilution analysis via LC-  
431 MS/MS was described previously [30, 31].

432 *Quantification of reactive oxygen species*—Determination was based upon analysis via  
433 flow cytometry/FACS. All incubation and washing steps of living cells were done in Krebs  
434 Ringer HEPES buffer (KRH) including 136 mM NaCl, 4.7mM KCl, 1.25mM CaCl<sub>2</sub>, 1.25mM  
435 MgSO<sub>4</sub>, 10mM HEPES, 0.1% Fatty Acid Free BSA; pH7.4. Cells were stained with Hoechst  
436 33258 NucBlue® (Thermo) for the detection of viable cells. Determination of reactive oxygen  
437 species was achieved incubating MCECs with CM-H2DCFDA (5  $\mu$ M in KRH buffer) for 30 min  
438 under reduced light conditions. After 2 washing steps, cells were trypsinized and resuspended in  
439 1 ml FACS-Buffer (10% FCS, 1 mM EDTA in PBS). Analysis of fluorophores was performed  
440 using a LSRII flow cytometer (BD Biosciences) by gating initial cell population via forward  
441 scatter against side scatter signals and detecting viable cells (Hoechst positive) by violet laser  
442 (Excitation: 405 nm; Filter: 450/40 nm). Hoechst positive cells were then analyzed for CM-  
443 H2DCFDA by a blue laser (Excitation: 488 nm; Filter: 530/30 nm).

444 *Determination/Visualization of DNA damage*—The determination and visualization of  
445 DNA damage was achieved using the comet assay as described previously [32].

446 *Western blotting*—20  $\mu$ g protein was incubated in 5x Laemmli buffer (Sigma) at 95°C for  
447 10 min and separated by a Mini-PROTEAN® TGX (Bio-Rad) precasted gel (4-20% acrylamide).  
448 Proteins were then transferred to a nitrocellulose membrane and blocked with 2% dry milk (in  
449 PBS) at room temperature for 1 h. Membranes were then incubated overnight at 4°C with  
450 antibodies against Glo1 (1:1000 dilution; ab137098; rabbit; Abcam), p53 (1:1000 dilution;  
451 ab131442; rabbit; Abcam), CamKII $\delta$  (1:1000 dilution; ab181052; rabbit; Abcam),  $\gamma$ H2aX  
452 (1:1000 dilution; 9718S; rabbit; Cell Signaling Technology), Histone H3 (1:2500 dilution;  
453 4499S; rabbit; Cell Signaling Technology), Gapdh (1:2500 dilution; 5174S; rabbit; Cell  
454 Signaling Technology) Beta-actin (1:2500 dilution; 4967S; rabbit; Cell Signaling Technology)  
455 in 2% dry milk containing PBS and 0.05% Tween20 (PBS-T). After 3 washing steps (5 min  
456 each) with PBS-T membranes were incubated with horseradish-linked goat anti-rat (1:2000  
457 dilution; 7077S; Cell Signaling Technology) or goat anti-rabbit (1:2000 dilution; 7077S; Cell  
458 Signaling Technology) antibody for 1h at room temperature. Proteins were visualized on X-Ray  
459 films using ECL detection reagents (GE healthcare) with varying exposure time (0.1 – 2 min).

460 *Separation and detection of phosphorylated Glo1*— Due to a lack of specificity, we were  
461 not able to produce a monoclonal phopsho-specific antibody against murine or human Glo1,  
462 even after commercial approaches (Monoclonal Antibody Core Facility, Helmholtz Zentrum  
463 Munich). The use of Phospho-tag gels was established, where a phosphorylatable protein shows  
464 a significant shift in the gel due to the included tags. Therefore, separation and detection of  
465 phosphorylated Glo1 was carried out as described previously with minor changes [33]. Briefly,  
466 we casted 10% SDS PAGE-Gels and instead of manganese (Mn<sup>2+</sup>-Phos-tag) we used zinc (Zn<sup>2+</sup>-

467 Phos-tag) which resulted in a better resolution of the proteins in the gel and better reproducibility  
468 after transfer.

469 *In vitro proliferation rate*—Determination of *in vitro* proliferation rate was achieved  
470 using 5-bromodeoxyuridine (BrdU) incorporation as described previously [34].

471 *In vitro Calcium/Calmodulin dependent Kinase II  $\delta$  (CamKII $\delta$ ) assay*—Kinase assays for  
472 CamKII $\delta$  have been performed as described previously with minor changes [35]. Briefly,  
473 CamKII $\delta$  kinase assays were performed in 20  $\mu$ l reaction volume with 1 $\times$  kinase buffer (0.5 mM  
474 MOPS, pH 7, 0.1% BSA, 1  $\mu$ M Calmodulin, 1 mM CaCl<sub>2</sub>, 10 mM MgCl<sub>2</sub>, 100  $\mu$ M [ $\gamma$ -<sup>32</sup>P]ATP  
475 (~1 Ci/mMole)). In each reaction tube, WT or human recombinant Glo1 was included as  
476 substrates (1  $\mu$ g/reaction) and 1 ng of CamKII $\delta$  kinase. The kinase reaction was conducted at  
477 30°C for 10 min and stopped by adding equal volume of urea solution (6 M) and the  
478 unincorporated label was removed by TCA precipitation of the proteins. The pellet was washed  
479 in ice cold acetone and dried. The pellet was then re-suspended in 20  $\mu$ l of 1 $\times$  PBS and processed  
480 with Laemmli's buffer. The kinase assay products were separated on 12% SDS-PAGE. The dried  
481 gel was used for Autoradiography.

482 *Isolation of Ubiquitin*—Isolation of polyubiquitin protein conjugates was achieved using  
483 a commercial Pierce™ Ubiquitin Enrichment Kit (Thermo) according to the manufacturer's  
484 instruction. Isolated total protein fractions (~30 $\mu$ g) were then used for western blotting and an  
485 anti-ubiquitin antibody (rabbit; included in Kit) was used as a loading control.

486 *Overexpression of CamKII $\delta$* —Host *E.coli* strain DH10B including a mammalian  
487 expression vector (pCMV-SPORT6) for CamKII $\delta$  (Horizon Discovery; Clone ID: MMM1013-  
488 202706167; Insert Sequence: BC042895) was plated out on LB-plates including 100  $\mu$ g/ml  
489 ampicillin and incubated overnight at 37°C. Three individual clones were picked and amplified  
490 in LB broth including antibiotics for 12 h at 37°C and isolated using GenElute™ HP Plasmid  
491 MaxiPrep Kit (Merck). Integrity of purified expression constructs was validated by gel  
492 electrophoresis and the concentration was determined by absorbance measurement. 1 $\times$ 10<sup>6</sup> murine  
493 cardiac endothelial cells were prepared for transfection using a NEON® electroporation  
494 transfection system (Thermo) with the following conditions; pulse voltage: 1,300 mV, pulse  
495 width: 20 ms, pulse number: 2. Schwann cells were either transfected with an empty plasmid  
496 containing only a sham vector (wild-type) or with the plasmid containing CamKII $\delta$  (CamKII $\delta$   
497 OE).

498 *Quantitative PCR*—Extraction of RNA was achieved using a peqGOLD MicroSpin Total  
499 RNA Kit (Peqlab), which was then converted into cDNA with a High-Capacity cDNA Reverse  
500 Transcription Kit (Thermo). qPCR was performed using DyNAmo ColorFlash SYBR Green  
501 qPCR Master Mix (Thermo) and a LightCycler® 480 Instrument II (Roche). Signals of amplified  
502 products were verified using melting curve analysis and mRNA levels were normalized to Beta-  
503 Actin. Relative expression levels were calculated using the  $\Delta\Delta$ Ct method described elsewhere  
504 [36]. Primer sequences used for analyzing mRNA content were: CamKII $\delta$  (PrimerBank ID:  
505 26333029a1), forward `5- CTAGGGACCATCAGAAACTGGA -3` and reverse `5-  
506 GGATCTGCTGAATGCAATGACTG -3`.

507 *Mouse models*—Wild-type C57BL/6, male mice were purchased from Charles River  
508 Laboratories (Wilmington, MA, USA) and streptozotocin (STZ) treatment was performed as  
509 previously described [37]. Age-matched, untreated mice served as controls. Blood glucose was  
510 adjusted with insulin glargine (Lantus®, Sanofi) to <350 mg/dl on a weekly basis. Male db/db  
511 mice (C57BL/6N-Lepr<sup>db</sup>) and respective controls (db/m) were also purchased from Charles  
512 River Laboratories (Wilmington, MA, USA). All mice received water and food ad libitum. Mice  
513 were sacrificed using carbon dioxide, perfused with 0.9 % sodium chloride, and the organs  
514 immediately isolated for analysis. All procedures were approved by the Animal Care and Use  
515 Committee at the regional authority in Karlsruhe, Germany (G319/14 and G295/15). Generation  
516 of CaMKII $\delta$  KO mice was described previously [38]. Animals received a standard diet and were  
517 maintained on a 12h light and dark cycle at a room temperature of  $22 \pm 2$  °C and room humidity  
518 of 55%. All experimental procedures were reviewed and approved by the Institutional Animal  
519 Care and Use Committee at the regional authority in Karlsruhe, Germany (35-9185.81/G-7/15).

520 *Statistical analysis*—Statistical data analysis was performed using GraphPad Prism 7  
521 (GraphPad Software Inc.). All data are expressed as mean values  $\pm$  standard deviation and were  
522 analyzed for significance using two-tailed unpaired t-test with Welch's correction. The  
523 comparison of more than one group was achieved using an ordinary one-way or two-way  
524 ANOVA analysis followed by comparing all groups using Tukey's (one-way ANOVA) or  
525 Sidak's (two-way ANOVA) multiple comparison test. Differences were considered significant at  
526  $p < 0.05$ . For all kinetic analyses, the data were fitted by nonlinear regression using the  
527 GraphPad PRISM 6 software (GraphPad Software Inc.), and  $K_m$  and  $V_{max}$  values were  
528 calculated.

529

### 530 **Acknowledgements**

531 This study was supported by the *Deutsche Forschungsgemeinschaft* (DFG; SFB1118) and the  
532 *Deutsche Zentrum für Diabetesforschung* (DZD).

### 533 **Author Contributions**

534 J.M., S.K., T.F., A.T., J.B. and P.N. designed experiments. J.M., J.K.H., J.C., S.K., performed  
535 experiments and collected the data. J.Z., M.C.C., A.S. and F.G.C. analyzed the data. J.M., T.F.,  
536 A.M., A.T., P.N. and J.B. conceived and discussed the strategy about ongoing experiments. J.M.,  
537 T.F. and P.N. wrote the manuscript, which was edited by all co-authors.

538



539 **Conflict of Interest**

540 The authors have no conflict of interest with the contents of this manuscript.

541 **References**

542 [1] McLellan, A.C., Thornalley, P.J., Benn, J., and Sonksen, P.H. (1994). Glyoxalase system in  
543 clinical diabetes mellitus and correlation with diabetic complications. *Clin. Sci.* 87, 21–29.

544 [2] Rabbani, N., and Thornalley, P.J. (2014). The Critical Role of Methylglyoxal and Glyoxalase  
545 1 in Diabetic Nephropathy. *Diabetes* 63, 50–52.

546 [3] Thornalley, P.J. (1993). The glyoxalase system in health and disease. *Mol. Aspects Med.* 14,  
547 287–371.

548 [4] Santarius, T., Bignell, G.R., Greenman, C.D., Widaa, S., Chen, L., Mahoney, C.L., Butler,  
549 A., Edkins, S., Waris, S., Thornalley, P.J., et al. (2010). GLO1-A novel amplified gene in human  
550 cancer. *Genes, Chromosomes and Cancer* 49, 711–725.

551 [5] Barkley-Levenson, A.M., Lagarda, F.A., and Palmer, A.A. (2018). Glyoxalase 1 (GLO1)  
552 Inhibition or Genetic Overexpression Does Not Alter Ethanol’s Locomotor Effects: Implications  
553 for GLO1 as a Therapeutic Target in Alcohol Use Disorders. *Alcoholism: Clinical and*  
554 *Experimental Research* 42, 869–878.

555 [6] Distler, M.G., Plant, L.D., Sokoloff, G., Hawk, A.J., Aneas, I., Wuenschell, G.E., Termini, J.,  
556 Meredith, S.C., Nobrega, M.A., and Palmer, A.A. (2012). Glyoxalase 1 increases anxiety by  
557 reducing GABAA receptor agonist methylglyoxal. *J. Clin. Invest.* 122, 2306–2315.

- 558 [7] Sahoo, R., Sengupta, R., and Ghosh, S. (2003). Nitrosative stress on yeast: inhibition of  
559 glyoxalase-I and glyceraldehyde-3-phosphate dehydrogenase in the presence of GSNO.  
560 *Biochem. Biophys. Res. Commun.* *302*, 665–670.
- 561 [8] Mitsumoto, A., Kim, K.R., Oshima, G., Kunimoto, M., Okawa, K., Iwamatsu, A., and  
562 Nakagawa, Y. (2000). Nitric oxide inactivates glyoxalase I in cooperation with glutathione. *J.*  
563 *Biochem.* *128*, 647–654.
- 564 [9] Van Herreweghe, F., Mao, J., Chaplen, F.W.R., Grooten, J., Gevaert, K., Vandekerckhove, J.,  
565 and Vancompernelle, K. (2002). Tumor necrosis factor-induced modulation of glyoxalase I  
566 activities through phosphorylation by PKA results in cell death and is accompanied by the  
567 formation of a specific methylglyoxal-derived AGE. *Proc. Natl. Acad. Sci. U.S.A.* *99*, 949–954.
- 568 [10] de Hemptinne, V., Rondas, D., Vandekerckhove, J., and Vancompernelle, K. (2007).  
569 Tumour necrosis factor induces phosphorylation primarily of the nitric-oxide-responsive form of  
570 glyoxalase I. *Biochemical Journal* *407*, 121–128.
- 571 [11] de Hemptinne, V., Rondas, D., Toepoel, M., and Vancompernelle, K. (2009).  
572 Phosphorylation on Thr-106 and NO-modification of glyoxalase I suppress the TNF-induced  
573 transcriptional activity of NF-kappaB. *Mol. Cell. Biochem.* *325*, 169–178.
- 574 [12] Dakin, H.D., Dudley, H.W. (1913). An enzyme concerned with the formation of hydroxy  
575 acids from ketonic aldehydes. *J. Biol. Chem.* *14*, 155-157.
- 576 [13] Szent-Györgyi, A., Együd, L.G., and McLaughlin, J.A. (1967). Keto-aldehydes and cell  
577 division. *Science* *155*, 539–541.

- 578 [14] Jang, S., Kwon, D.M., Kwon, K., and Park, C. (2017). Generation and characterization of  
579 mouse knockout for glyoxalase 1. *Biochem. Biophys. Res. Commun.* *490*, 460–465.
- 580 [15] Schumacher, D., Morgenstern, J., Oguchi, Y., Volk, N., Kopf, S., Groener, J.B., Nawroth,  
581 P.P., Fleming, T., and Freichel, M. (2018). Compensatory mechanisms for methylglyoxal  
582 detoxification in experimental & clinical diabetes. *Molecular Metabolism* *18*, 143–152.
- 583 [16] Shin, R., Alvarez, S., Burch, A.Y., Jez, J.M., and Schachtman, D.P. (2007).  
584 Phosphoproteomic identification of targets of the Arabidopsis sucrose nonfermenting-like kinase  
585 SnRK2.8 reveals a connection to metabolic processes. *Proceedings of the National Academy of*  
586 *Sciences* *104*, 6460–6465.
- 587 [17] Inoue, Y., Choi, B.Y., Murata, K., and Kimura, A. (1990). Sexual response of  
588 *Saccharomyces cerevisiae*: phosphorylation of yeast glyoxalase I by a cell extract of mating  
589 factor-treated cells. *J. Biochem.* *108*, 4–6.
- 590 [18] Birkenmeier, G., Stegemann, C., Hoffmann, R., Günther, R., Huse, K., and Birkemeyer, C.  
591 (2010). Posttranslational Modification of Human Glyoxalase 1 Indicates Redox-Dependent  
592 Regulation. *PLoS ONE* *5*, e10399.
- 593 [19] Morgenstern, J., Fleming, T., Schumacher, D., Eckstein, V., Freichel, M., Herzig, S., and  
594 Nawroth, P. (2017). Loss of Glyoxalase 1 Induces Compensatory Mechanism to Achieve  
595 Dicarboxyl Detoxification in Mammalian Schwann Cells. *J. Biol. Chem.* *292*, 3224–3238.
- 596 [20] Thornalley, P.J. (2003). Glyoxalase I – structure, function and a critical role in the  
597 enzymatic defence against glycation. *Biochemical Society Transactions* *31*, 1343–1348.

- 598 [21] Moraru, A., Wiederstein, J., Pfaff, D., Fleming, T., Miller, A.K., Nawroth, P., and Telemán,  
599 A.A. (2018). Elevated Levels of the Reactive Metabolite Methylglyoxal Recapitulate  
600 Progression of Type 2 Diabetes. *Cell Metabolism* 27, 926–934.e8.
- 601 [22] Lo, T.W., Westwood, M.E., McLellan, A.C., Selwood, T., and Thornalley, P.J. (1994).  
602 Binding and modification of proteins by methylglyoxal under physiological conditions. A kinetic  
603 and mechanistic study with N alpha-acetylarginine, N alpha-acetylcysteine, and N alpha-  
604 acetyllysine, and bovine serum albumin. *J. Biol. Chem.* 269, 32299–32305.
- 605 [23] Ridderström, M., Cameron, A.D., Jones, T.A., and Mannervik, B. (1998). Involvement of an  
606 Active-site Zn<sup>2+</sup> Ligand in the Catalytic Mechanism of Human Glyoxalase I. *Journal of*  
607 *Biological Chemistry* 273, 21623–21628.
- 608 [24] Schalkwijk, C., and Stehouwer, C.D. (2019). Methylglyoxal, a highly reactive dicarbonyl  
609 compound, in diabetes, its vascular complications and other age-related diseases. *Physiological*  
610 *Reviews*.
- 611 [25] Kreycky, N., Gotzian, C., Fleming, T., Flechtenmacher, C., Grabe, N., Plinkert, P., Hess, J.,  
612 and Zaoui, K. (2017). Glyoxalase 1 expression is associated with an unfavorable prognosis of  
613 oropharyngeal squamous cell carcinoma. *BMC Cancer* 17.
- 614 [26] Wang, Y., Kuramitsu, Y., Ueno, T., Suzuki, N., Yoshino, S., Iizuka, N., Akada, J.,  
615 Kitagawa, T., Oka, M., and Nakamura, K. (2012). Glyoxalase I (GLO1) is up-regulated in  
616 pancreatic cancerous tissues compared with related non-cancerous tissues. *Anticancer Res.* 32,  
617 3219–3222.

- 618 [27] Rabbani, N., and Thornalley, P.J. (2011). Glyoxalase in diabetes, obesity and related  
619 disorders. *Semin. Cell Dev. Biol.* 22, 309–317.
- 620 [28] Bradford, M. M. (1976). A rapid and sensitive method for the quantitation of microgram  
621 quantities of protein utilizing the principle of protein-dye binding. *Anal. Biochem.* 72, 248–254.
- 622 [29] McLellan, A. C., and Thornalley, P. J. (1989). Glyoxalase activity in human red blood cells  
623 fractionated by age. *Mech. Ageing Dev.* 48, 63–71.
- 624 [30] Rabbani, N., and Thornalley, P. J. (2014). Measurement of methylglyoxal by stable isotopic  
625 dilution analysis LC-MS/MS with corroborative prediction in physiological samples. *Nat.*  
626 *Protoc.* 9, 1969–1979.
- 627 [31] Thornalley, P. J., and Rabbani, N. (2014). Detection of oxidized and glycated proteins in  
628 clinical samples using mass spectrometry — A user’s perspective. *BBA-Gen. Subjects* 1840,  
629 818–829.
- 630 [32] Olive, P.L., and Banáth, J.P. (2006). The comet assay: a method to measure DNA damage in  
631 individual cells. *Nature Protocols* 1, 23–29.
- 632 [33] Kinoshita, E., Kinoshita-Kikuta, E., and Koike, T. (2009). Separation and detection of large  
633 phosphoproteins using Phos-tag SDS-PAGE. *Nature Protocols* 4, 1513–1521.
- 634 [34] Darzynkiewicz, Z., and Juan, G. (2001). Analysis of DNA content and BrdU incorporation.  
635 *Curr Protoc Cytom Chapter 7, Unit 7.7.*

- 636 [35] Kumar, V., Fleming, T., Terjung, S., Gorzelanny, C., Gebhardt, C., Agrawal, R., Mall,  
637 M.A., Ranzinger, J., Zeier, M., Madhusudhan, T., et al. (2017). Homeostatic nuclear RAGE-  
638 ATM interaction is essential for efficient DNA repair. *Nucleic Acids Res.* *45*, 10595–10613.
- 639 [36] Livak, K. J., and Schmittgen, T. D. (2001) Analysis of Relative Gene Expression Data  
640 Using Real-Time Quantitative PCR and the  $2^{-\Delta\Delta CT}$  Method. *Methods.* *25*, 402–408.
- 641 [37] Like, A. A., Rossini, A. A. (1976) Streptozotocin-induced pancreatic insulinitis: new model of  
642 diabetes mellitus. *Science (New York, N.Y.)* *193(4251)*: 415–7.
- 643 [38] Backs J., Backs T., Neef S., Kreusser M. M., Lehmann L. H., Patrick D. M., Grueter C. E.,  
644 Qi X., Richardson J. A., Hill J. A., Katus H. A., Bassel-Duby R., Maier L. S., Olson E. N. (2009)  
645 The delta isoform of CaM kinase II is required for pathological cardiac hypertrophy and  
646 remodeling after pressure overload. *Proc Natl Acad Sci U S A* *106*:2342-2347.
- 647

## Enzyme Efficiency

## Protein Degradation

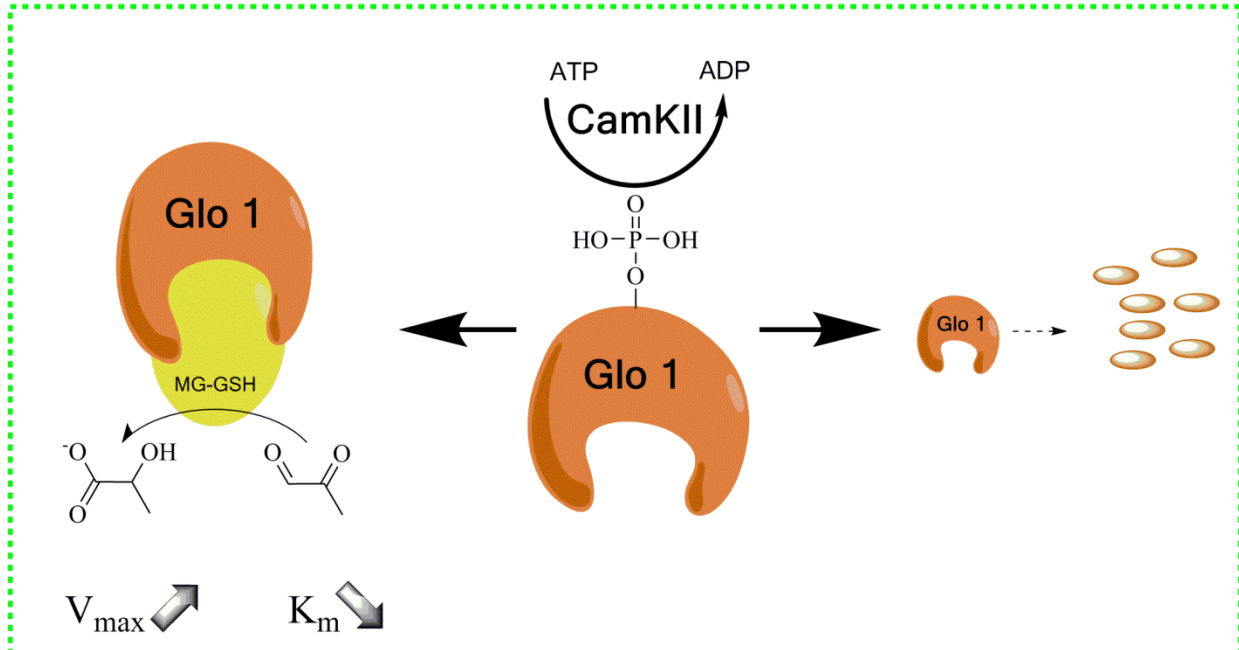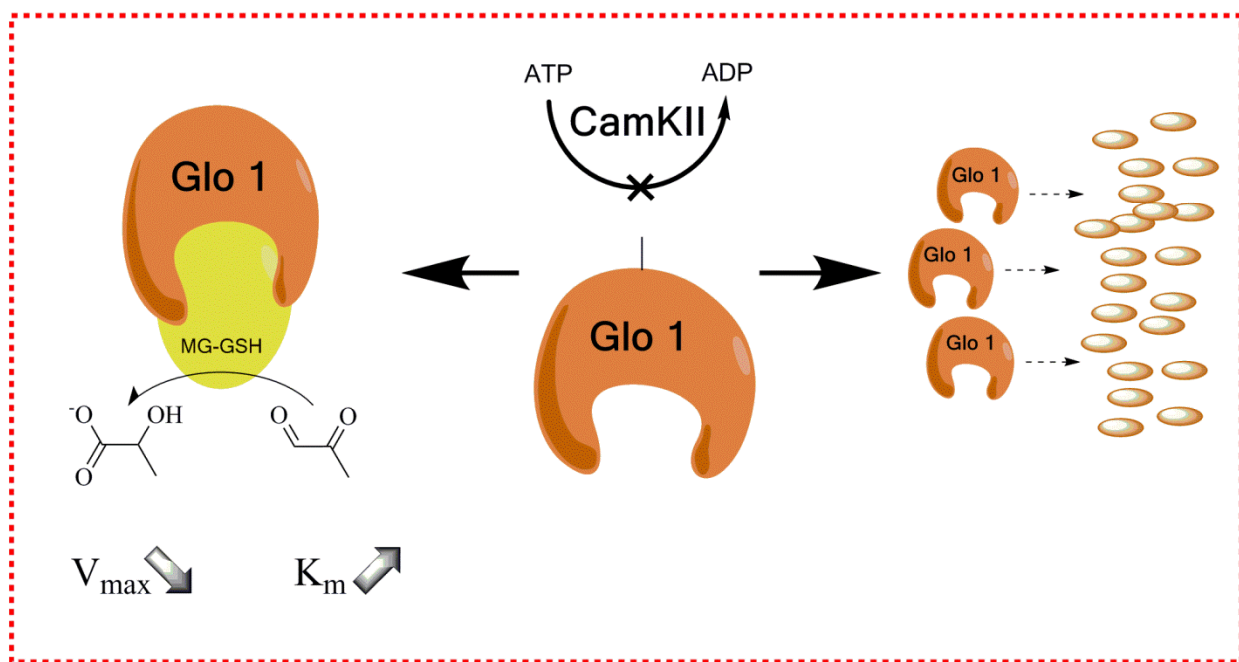

## Enzyme Efficiency

## Protein Degradation



649

650

651

652



653

654 **Supplementary Figure 1**

**Sequence Alignment of Glo1 Mutants**

```
.....10.....20.....30.....40.....50.....60.....70.....80.....90.....100.....110.....120.....130.....140
Wild-type .....CGTCCGTTTGTACTAGGSCAGGTTGGTGAITCTCCAGGSCAGCCATGGCAGAGCCACAGCGGCGTCCAGTGGCTCACTGATGAGACCGCTTTCAGCTGCTCCGATCCAGA
NP-Mutant .....TAGGGCAGGTTGGTGAITCTCCAGGSCAGCCATGGCAGAGCCACAGCGGCGTCCAGTGGCTCACTGATGAGACCGCTTTCAGCTGCTCCGATCCAGA
P-Mutant  CGCGGACGCGTGGCGACCCACGCGTCCGTTTGTACTAGGSCAGGTTGGTGAITCTCCAGGSCAGCCATGGCAGAGCCACAGCGGCGTCCAGTGGCTCACTGATGAGACCGCTTTCAGCTGCTCCGATCCAGA
.....150.....160.....170.....180.....190.....200.....210.....220.....230.....240.....250.....260.....270.....280
Wild-type  CCCGACCCCAAGGATTTCTACTGCGCAACGATGCTAAGAATTAGGATCCTAAGAAGTCCCTGGATTTTATACGAGGTTCTTGGACTGACCCCTCCGAGAGCTTGACTTCCCTGCTATGAAGTCTCGCTCT
NP-Mutant  CCCGACCCCAAGGATTTCTACTGCGCAACGATGCTAAGAATTAGGATCCTAAGAAGTCCCTGGATTTTATACGAGGTTCTTGGACTGACCCCTCCGAGAGCTTGACTTCCCTGCTATGAAGTCTCGCTCT
P-Mutant  CCCGACCCCAAGGATTTCTACTGCGCAACGATGCTAAGAATTAGGATCCTAAGAAGTCCCTGGATTTTATACGAGGTTCTTGGACTGACCCCTCCGAGAGCTTGACTTCCCTGCTATGAAGTCTCGCTCT
.....290.....300.....310.....320.....330.....340.....350.....360.....370.....380.....390.....400.....410.....420
Wild-type  ACTTCTTAGCTTACGAGGATAGAGAGATATCCCAAGGACAGTCCGAGAGACAGCATGGATGTTTCCAGAAAAGCCACCTTGGACTCAGCACAACCTGGGGCACTGAGATGACGAGACTCAGAGTTACCAAC
NP-Mutant  ACTTCTTAGCTTACGAGGATAGAGAGATATCCCAAGGACAGTCCGAGAGACAGCATGGATGTTTCCAGAAAAGCCACCTTGGACTCAGCACAACCTGGGGCACTGAGATGACGAGACTCAGAGTTACCAAC
P-Mutant  ACTTCTTAGCTTACGAGGATAGAGAGATATCCCAAGGACAGTCCGAGAGACAGCATGGATGTTTCCAGAAAAGCCACCTTGGACTCAGCACAACCTGGGGCACTGAGATGACGAGACTCAGAGTTACCAAC
.....430.....440.....450.....460.....470.....480.....490.....500.....510.....520.....530.....540.....550.....560
Wild-type  GGCACCTCGGACCCCTCGTGGATTGGTCAATGGGATTCGGITCCGATGCTACAGTGCCTGTAAAGATTGAAGAAGTGGGTTGTTGAGAGAGCCGTGATGACGGGAAATGAAGGACTGGCGTTCAT
NP-Mutant  GGCACCTCGGACCCCTCGTGGATTGGTCAATGGGATTCGGITCCGATGCTACAGTGCCTGTAAAGATTGAAGAAGTGGGTTGTTGAGAGAGCCGTGATGACGGGAAATGAAGGACTGGCGTTCAT
P-Mutant  GGCACCTCGGACCCCTCGTGGATTGGTCAATGGGATTCGGITCCGATGCTACAGTGCCTGTAAAGATTGAAGAAGTGGGTTGTTGAGAGAGCCGTGATGACGGGAAATGAAGGACTGGCGTTCAT
.....570.....580.....590.....600.....610.....620.....630.....640.....650.....660.....670.....680.....690.....700
Wild-type  TCAGACCCCTGACGCGTACTGGATTGAGATTCTGAATCCTAACAAAATAGCAAGATTATTTAGTTCGAGGAAATGGGCTTTGAGGTGTGGGACAGCGGACAGCCGCTGGAAAGAAACAGCGTTCAT
NP-Mutant  TCAGACCCCTGACGCGTACTGGATTGAGATTCTGAATCCTAACAAAATAGCAAGATTATTTA-----
P-Mutant  TCAGACCCCTGACGCGTACTGGATTGAGATTCTGAATCCTAACAAAATAGCAAGATTATTTAGTTC
.....710.....720.....730.....740.....750.....760.....770.....780.....790.....800.....810.....820
Wild-type  AGGATGCTGGGCGACAGAGCGTGGGACTGATGGGTCCTCTGCTCCAGTTCATCTCCCTGAAACCTTTTCATTGCTGATTCAGTGGGTTTTTAAAAATCTCCCTCTGTTTGGCA
NP-Mutant  K D A A A T R S V G D * W V S L L Q F K S S * N P F H C P D S V G F L K I S P L F C
P-Mutant  -----
```

655

656 **Sequence Alignment of Glo1 mutants**

657
